# Supplementary material for: The effect of permanent electric dipoles on the stability and photoelectric properties of MAPbI3 films
Source: Royal Society of Chemistry journal article supplement (doi:10.1039/d2tc04812d), 2023-01-01
Supplement: d2tc04812d1.pdf [file d2tc04812d1.pdf]

## Supplementary Information

### **The effect of permanent electric dipoles on the stability and photoelectric properties of MAPbI<sub>3</sub>**

Liufang Chen<sup>1</sup>, Zhihang Zhang<sup>1</sup>, Wenjing Zhai<sup>1</sup>, Guangyuan Li<sup>1</sup>, Lin Huang<sup>1</sup>, Xinyu Li<sup>1</sup>, Wenhao Zheng<sup>1</sup>, Lin. Lin<sup>2</sup>, Xiaohui Zhou<sup>1</sup>, Zhibo Yan<sup>1, a)</sup> and Jun-Ming Liu<sup>1,3</sup>

<sup>1</sup> *National Laboratory of Solid State Microstructures, School of Physics, Collaborative Innovation Center of Advanced Microstructures, Nanjing University, Nanjing 210093, China*

<sup>2</sup> *Department of Applied Physics, College of Science, Nanjing Forestry University, Nanjing 210037, China*

<sup>3</sup> *Institute for Advanced Materials, Hubei Normal University, Huangshi 435001, China*

a) Author to whom correspondence should be addressed: [zbyan@nju.edu.cn](mailto:zbyan@nju.edu.cn)

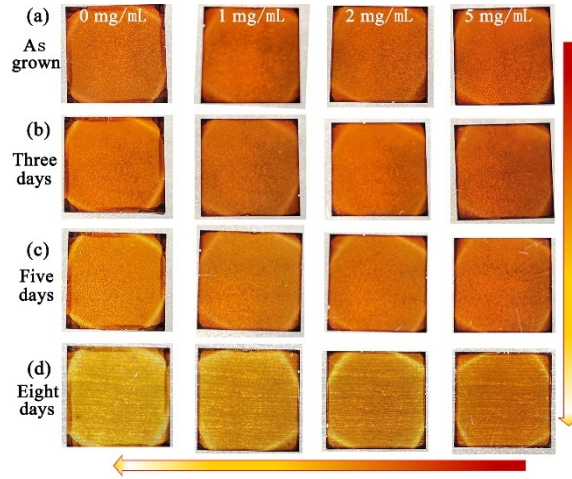

**Fig. S1** Time-dependent color changes of the MAPbI<sub>3</sub> films with different P(VDF-TrFE) concentrations, measured in the atmosphere.

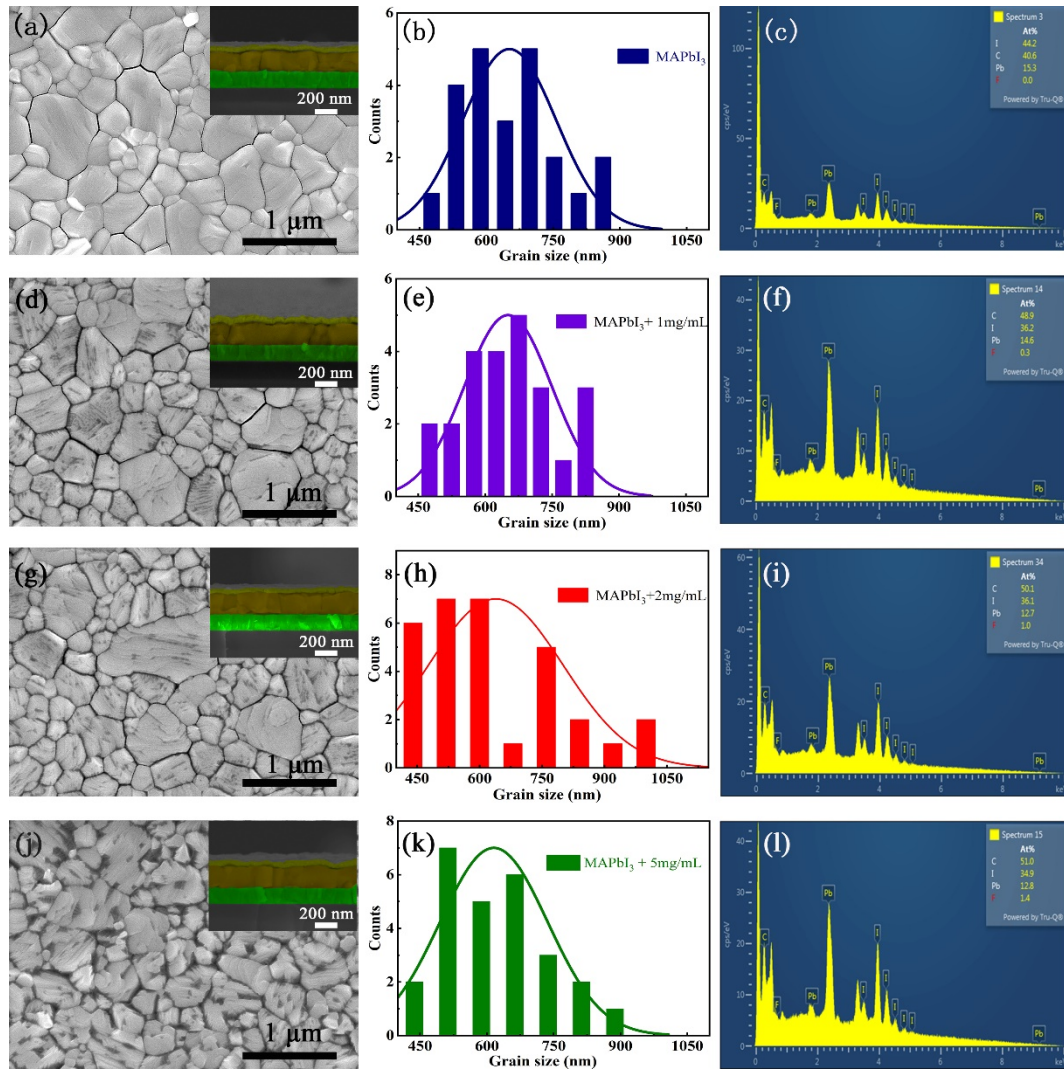

**Fig. S2** Top-view and cross-sectional (Inset) SEM images, distributions of grain

size, and EDS analysis of the MAPbI<sub>3</sub> films, with the P(VDF-TrFE) concentration of 0 mg/mL (a-c), 1 mg/mL (d-f), 2 mg/mL (g-i), and 5 mg/mL (j-l), respectively.

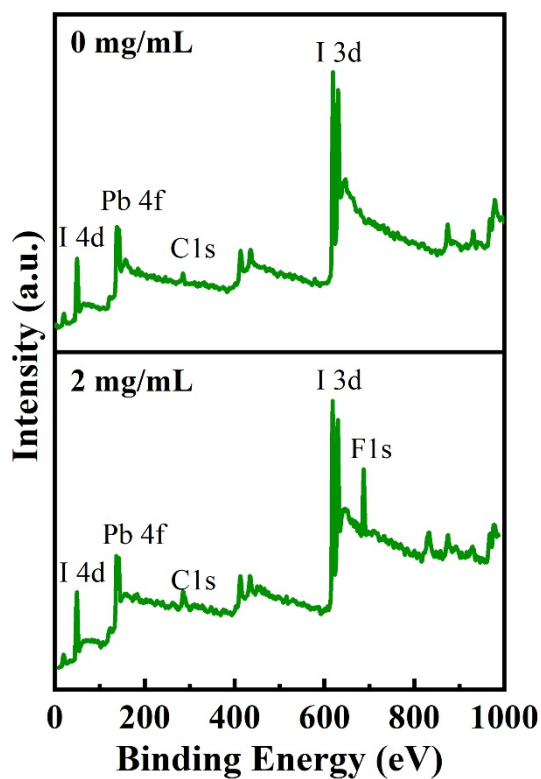

**Fig. S3** XPS spectra of the pure MAPbI<sub>3</sub> and 2 mg/mL P(VDF-TrFE) added MAPbI<sub>3</sub> films

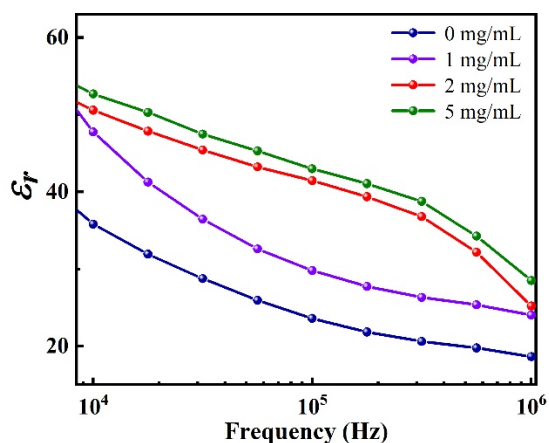

**Fig.S4** Frequent-dependent dielectric constant of the different MAPbI<sub>3</sub> films added by 0, 1, 2, and 5 mg/mL P(VDF-TrFE) respectively.

| P(VDF-TrFE)<br>Amount<br>(mg/mL) | $\epsilon_r$<br>@10 KHz | $N_{\text{trap}}$<br>( $\text{cm}^{-3}$ )<br>@10 KHz | Mobility<br>( $\text{cm}^2\text{V}^{-1}\text{s}^{-1}$ )<br>@10 KHz | $\epsilon_r$<br>@1 MHz | $N_{\text{trap}}$<br>( $\text{cm}^{-3}$ )<br>@1 MHz | Mobility<br>( $\text{cm}^2\text{V}^{-1}\text{s}^{-1}$ )<br>@1 MHz |
|----------------------------------|-------------------------|------------------------------------------------------|--------------------------------------------------------------------|------------------------|-----------------------------------------------------|-------------------------------------------------------------------|
| 0                                | 37                      | $1.53 \times 10^{17}$                                | $3.25 \times 10^{-2}$                                              | 20                     | $8.25 \times 10^{16}$                               | $6.01 \times 10^{-2}$                                             |
| 1                                | 46                      | $1.48 \times 10^{17}$                                | $4.08 \times 10^{-2}$                                              | 24                     | $7.70 \times 10^{16}$                               | $7.82 \times 10^{-2}$                                             |
| 2                                | 50                      | $1.31 \times 10^{17}$                                | $6.68 \times 10^{-2}$                                              | 26                     | $6.83 \times 10^{16}$                               | $1.28 \times 10^{-1}$                                             |
| 5                                | 52                      | $1.76 \times 10^{17}$                                | $3.61 \times 10^{-2}$                                              | 28                     | $9.45 \times 10^{16}$                               | $6.71 \times 10^{-2}$                                             |

Table1. The dielectric constant, defect density, and carrier mobility of the MAPbI<sub>3</sub> films with different amounts of P(VDF-TrFE) at 10 KHz and 1 MHz, respectively.

| P(VDF-TrFE)<br>Amount<br>(mg/ml) | $V_{TFL}$ (V) | Defect density<br>( $\times 10^{17} \text{ cm}^{-3}$ ) | Mobility<br>( $\times 10^{-2} \text{ cm}^2\text{V}^{-1}\text{s}^{-1}$ ) | $V_2$ (V) | Defect density<br>( $\times 10^{17} \text{ cm}^{-3}$ ) | Mobility<br>( $\times 10^{-2} \text{ cm}^2\text{V}^{-1}\text{s}^{-1}$ ) |
|----------------------------------|---------------|--------------------------------------------------------|-------------------------------------------------------------------------|-----------|--------------------------------------------------------|-------------------------------------------------------------------------|
|                                  | Classic       | Classic                                                | Classic                                                                 | New       | New                                                    | New                                                                     |
| 0                                | 1.49          | 1.53                                                   | 3.25                                                                    | 1.78      | 1.82                                                   | 3.25                                                                    |
| 1                                | 1.16          | 1.48                                                   | 4.08                                                                    | 1.28      | 1.63                                                   | 4.08                                                                    |
| 2                                | 0.95          | 1.31                                                   | 6.68                                                                    | 1.02      | 1.41                                                   | 6.68                                                                    |
| 5                                | 1.22          | 1.76                                                   | 3.61                                                                    | 1.25      | 1.80                                                   | 3.61                                                                    |

Table 2. The comparison of trap density and carrier mobility, by using the  $V_{TFL}$  obtained with the classic SCLC and new method respectively. The dielectric constant measured at 10 kHz was used.
